# Supplementary material for: Transcriptome profiling helps to elucidate the mechanisms of ripening and epidermal senescence in passion fruit (Passiflora edulia Sims)
Source: PLoS One. 2020 Sep 25;15(9):e0236535. doi: 10.1371/journal.pone.0236535 (PMC7518611; doi:10.1371/journal.pone.0236535)
Supplement: S1 File — (XLSX) [file pone.0236535.s004.xlsx]

## Sheet: SF1
Expression profile of DEGs expression related to flavonoids and anthocyanin synthesis
Gene ID	A	B	C
Cluster-29126.9897	0	58.8	1357.7
Cluster-29126.8500	0.43	48.49	1519.61
Cluster-29126.6929	2.59	28.53	812.97
Cluster-29126.7270	4.75	1.98	33.77
Cluster-29126.23005	0.36	117.58	2240.43
Cluster-24299.1	0.57	1.49	33.18
Cluster-29126.23818	4.81	30.68	664.69
Cluster-29126.9769	0.15	26.8	632.47
Cluster-29126.7045	2.02	1.03	11.55
Cluster-29126.25144	1.04	1.36	8.56
Cluster-29126.17109	104.64	43.51	230.44
Cluster-29126.24726	0	20.1	615.27
Expression profile of DEGs expression related to synthesis of carotenoids
Gene ID	A	B	C
Cluster-29126.19339	28.26	74.93	101.97
Cluster-29126.13075	7.08	23.86	34
Cluster-29126.18928	5.2	14.88	19.72
Cluster-29126.9637	0.24	3.34	32.18
Cluster-29126.9636	0.34	4.04	30.44
Cluster-29126.23422	6.21	22.72	16.61
Cluster-29126.16833	33.47	158.45	120.28
Cluster-29126.16831	62.08	611.55	625.19
Cluster-29126.15304	15.87	78.92	68.53
Cluster-29126.17170	20.06	109.19	66.42
Cluster-29126.12694	6.91	17.92	24.51

## Sheet: SF2
Expression profile of DEGs expression related to phenylpropanoid biosynthesis pathway
Gene ID	mean_fpkm(A)	mean_fpkm(B)	mean_fpkm(C)	KO ID	KO Name	KO Description
Cluster-29126.6512	0.02	7.01	22.05	K09755	CYP84A, F5H	ferulate-5-hydroxylase
Cluster-29126.10689	12.4	54.59	186.95	K05349	bglX	beta-glucosidase
Cluster-26028.0	4.1	0.31	0.33	K00083	E1.1.1.195	cinnamyl-alcohol dehydrogenase
Cluster-29126.9235	12.66	39.76	219.42	K10775	E4.3.1.24	phenylalanine ammonia-lyase
Cluster-29126.4949	0.83	8.57	12.44	K01904	4CL	4-coumarate--CoA ligase
Cluster-29126.17268	34.24	110.47	119.81	K00430	E1.11.1.7	peroxidase
Cluster-29126.12283	12.6	485.45	485.98	K01188	E3.2.1.21	beta-glucosidase
Cluster-29126.11719	5.24	1.1	0.31	K00430	E1.11.1.7	peroxidase
Cluster-29126.12284	14.78	895.34	1193.67	K01188	E3.2.1.21	beta-glucosidase
Cluster-29126.16364	18.92	1.98	5.4	K10775	E4.3.1.24	phenylalanine ammonia-lyase
Cluster-29126.12602	20.14	1.99	4.24	K00430	E1.11.1.7	peroxidase
Cluster-29126.27618	5.17	0.43	1	K00430	E1.11.1.7	peroxidase
Cluster-29126.28888	5.06	1.26	0.55	K00430	E1.11.1.7	peroxidase
Cluster-29126.9818	16.61	100.99	51.6	K00083	E1.1.1.195	cinnamyl-alcohol dehydrogenase
Cluster-29126.12974	20.87	1.33	0.43	K00430	E1.11.1.7	peroxidase
Cluster-29126.13802	30.66	2.93	7.33	K00083	E1.1.1.195	cinnamyl-alcohol dehydrogenase
Cluster-29126.10690	4.7	24.05	88.33	K05349	bglX	beta-glucosidase
Cluster-29126.24880	0.74	9.76	9.38	K05349	bglX	beta-glucosidase
Cluster-29126.14867	49.29	14.22	6.9	K01188	E3.2.1.21	beta-glucosidase
Cluster-29126.19145	61.37	357.73	525.05	K01188	E3.2.1.21	beta-glucosidase
Cluster-29126.13674	8.16	394.52	480.02	K01188	E3.2.1.21	beta-glucosidase
Cluster-29126.19675	74.72	13.58	1.62	K05350	bglB	beta-glucosidase
Cluster-29126.15857	3.99	16.23	18.24	K01188	E3.2.1.21	beta-glucosidase
Cluster-29126.15856	72.32	359.3	363.75	K01188	E3.2.1.21	beta-glucosidase
Cluster-29126.16165	28.76	8.3	8.84	K00430	E1.11.1.7	peroxidase
Cluster-29126.11318	8.06	0.27	0.78	K01188	E3.2.1.21	beta-glucosidase
Cluster-29126.16755	173.08	34.02	49.35	K09754	CYP98A3, C3'H	coumaroylquinate(coumaroylshikimate) 3'-monooxygenase
Cluster-29126.15770	123.73	3.07	6.95	K00430	E1.11.1.7	peroxidase
Cluster-29126.18644	229.48	36.39	8.04	K00430	E1.11.1.7	peroxidase
Cluster-29126.9950	0.8	172.39	240.18	K01188	E3.2.1.21	beta-glucosidase
Cluster-29126.5571	0.33	2	2.87	K12356	UGT72E	coniferyl-alcohol glucosyltransferase
Cluster-29126.13688	54.29	574.52	605.36	K09753	CCR	cinnamoyl-CoA reductase
Cluster-29126.15240	344.91	75.07	44.97	K00588	E2.1.1.104	caffeoyl-CoA O-methyltransferase
Cluster-29126.19858	102.01	414.64	373.23	K01188	E3.2.1.21	beta-glucosidase
Cluster-29126.9897	0	58.8	1357.7	K00475	E1.14.11.9	naringenin 3-dioxygenase
Cluster-29126.16755	173.08	34.02	49.35	K09754	CYP98A3, C3'H	coumaroylquinate(coumaroylshikimate) 3'-monooxygenase
Cluster-29126.6929	2.59	28.53	812.97	K00660	CHS	chalcone synthase
Cluster-29126.23005	0.36	117.58	2240.43	K05277	E1.14.11.19	leucoanthocyanidin dioxygenase
Cluster-29126.23818	4.81	30.68	664.69	K05280	E1.14.13.21	flavonoid 3'-monooxygenase
Cluster-29126.8500	0.43	48.49	1519.61	K00660	CHS	chalcone synthase
Cluster-29126.6305	0	0.58	15.39	K08695	ANR	anthocyanidin reductase
Cluster-29126.9769	0.15	26.8	632.47	K13082	DFR	bifunctional dihydroflavonol 4-reductase/flavanone 4-reductase
Cluster-29126.22876	0.62	82.23	49.71	K13081	LAR	leucoanthocyanidin reductase
Cluster-29126.7430	0.03	2.37	2.29	K00660	CHS	chalcone synthase
Cluster-29126.15240	344.91	75.07	44.97	K00588	E2.1.1.104	caffeoyl-CoA O-methyltransferase
Cluster-29126.24726	0	20.1	615.27	K05277	E1.14.11.19	leucoanthocyanidin dioxygenase

## Sheet: SF3
DEGs expression profile related to starch and sucrose metabolism
Gene ID	A	B	C	E	G	J
Cluster-29126.8420	1.72	6.09	6.74	1.74	6.26	1.15
Cluster-29126.13902	28.31	140.86	99.78	27.35	41.95	31.26
Cluster-29126.7977	3.79	21.23	30.37	6.53	9.61	8.5
Cluster-29126.22722	1.63	1.28	1.58	0.3	1	1.07
Cluster-29126.19150	47.16	64.26	38.55	13.09	28.44	14.21
Cluster-29126.12284	14.78	895.34	1193.67	411.38	255.97	247.25
Cluster-29126.16363	45.93	75.62	33.05	9.96	23.27	21.64
Cluster-29126.22149	15.84	10.05	39.52	6	19.06	16.22
Cluster-29126.10589	12.44	19.98	15.69	4.9	11	8.92
Cluster-29126.19596	21.28	20.58	65.11	4.62	8.39	7.75
Cluster-29126.23314	1.72	220.96	196.84	65.85	107.28	34.43
Cluster-29126.23839	1.62	4.77	3.48	0.97	1.46	0.46
Cluster-29126.7051	2.99	4.52	3.95	0.53	1.54	0.78
Cluster-29126.19473	3.49	12.13	11.03	0.72	4.7	1.71
Cluster-29126.24880	0.74	9.76	9.38	2.07	4.26	2.57
Cluster-29126.14867	49.29	14.22	6.9	1.17	0.95	1.24
Cluster-23954.0	1.85	0.36	1.67	0	2.51	0.51
Cluster-29126.6660	6.25	11.34	2.35	0.2	0.28	1
Cluster-29126.25087	0	0.06	1.82	0.07	0.84	0.54
Cluster-29126.23754	12.58	15.25	27.08	5.52	16.34	6.34
Cluster-29126.24764	1.35	1.55	3.63	1.14	3.09	1.71
Cluster-29126.24150	1.73	3.69	4.92	0.69	1.8	2.05
Cluster-29126.11724	11.72	14.12	21.89	6.19	9.96	9.32
Cluster-29126.19675	74.72	13.58	1.62	0.42	0.16	0.35
Cluster-29126.15857	3.99	16.23	18.24	2.54	7.43	4.19
Cluster-29126.15856	72.32	359.3	363.75	84.36	124.2	101.29
Cluster-29126.13990	31.26	70.97	17.26	0.5	5.63	6.92
Cluster-23826.0	0.55	0.34	2.31	0.28	0.24	0.39
Cluster-28506.0	0.79	0.89	2.03	0.3	0.38	0.29
Cluster-29126.9937	9.92	24.97	17.14	5.56	14.1	5.29
Cluster-29126.19580	12.5	9.08	6.52	1.07	4.35	1.63
Cluster-29126.9950	0.8	172.39	240.18	54.35	68.24	54.08
Cluster-29126.14559	15.19	13.39	14.28	4.28	6.09	9.6
Cluster-29126.19858	102.01	414.64	373.23	119.48	153.98	106.6

## Sheet: SF4
DEGs expression profile related to plant hormone signal transduction
Gene ID	A	B	C	E	G	J
Cluster-29126.17622	60.14	148.99	145.04	36.59	63.36	60.52
Cluster-29126.20243	49.68	69.17	79.8	23.85	34.26	34.96
Cluster-29126.16795	91.41	62.8	13.46	1.02	5.13	1.52
Cluster-29126.8467	5.04	10.7	9.04	2.48	2.09	2.41
Cluster-29126.23068	4.01	217.17	157.46	20.45	31.48	12.32
Cluster-29126.20036	33.18	120.01	103.48	28.59	59.43	43.43
Cluster-29126.17763	15.92	36.93	31.62	8.81	15.02	13.78
Cluster-29126.8083	29.82	11.12	6.27	0.95	5.81	2.13
Cluster-29126.13313	29.79	17.9	21.62	7.7	11.21	20.88
Cluster-29126.16006	24.65	13.36	10.6	1.75	3.29	4.72
Cluster-29126.8342	2.01	4.94	5.37	1.72	2.48	2.89
Cluster-29126.13230	8.51	3.84	3.83	0.85	3.65	1.52
Cluster-29126.14107	91.57	107.83	121.47	21.33	39.84	31.09
Cluster-29126.13079	21.2	32.77	27.75	8.58	14.3	12.81
Cluster-29126.21092	19.12	43.55	25.48	8.64	15.33	14.7
Cluster-29126.9701	1.83	13.24	7.23	0.89	4.73	2.46
Cluster-29126.8974	5.77	33.77	24.31	8.28	24.96	13.92
Cluster-29126.20986	5.3	5.46	2.75	0.69	3.36	3.9
Cluster-29126.17693	94.7	96.25	94.92	27.02	35.07	24.2
Cluster-29126.19196	1.26	2.73	2.99	0.56	1.4	0.6
Cluster-29126.21311	6.51	11.87	10.29	2.27	8.95	4.28
Cluster-29126.28572	0.64	0.49	0.74	0.07	0.24	0.76
Cluster-29126.16799	15.74	33.95	23.2	6.26	10.17	4.53
Cluster-29126.14547	5.62	9.8	6.78	1.39	1.49	2.83
Cluster-24584.0	4.74	2.28	1.1	0.13	0.37	0.81
Cluster-29126.17732	46.27	48.46	31.34	4.47	10.5	9.85
Cluster-29126.20215	40.14	17.13	6.7	1.21	2.15	2.38
Cluster-29126.15387	4.29	4.06	5.41	1.24	5.78	3.71
Cluster-29126.19690	26.84	39.22	26.75	8.23	18.33	15.42
Cluster-29126.17040	107.97	109.32	123.73	43.67	66.99	49.3
Cluster-29126.17359	39.7	140	164.5	42.7	53.31	58.22
Cluster-27515.0	0.93	1.24	0.79	0.08	0.42	0.29
Cluster-20246.0	0.41	0.7	2.45	0.12	0.21	0.26
Cluster-29126.20789	12.76	24.52	22.14	5.39	11.75	9.32
Cluster-22745.0	1.39	5.94	3.83	0.6	0.35	0.43
Cluster-29126.18583	7.85	27.48	38.58	8.27	19.12	15
Cluster-29126.18870	22.05	58.21	35.67	12.28	22.22	7.13
Cluster-29126.19488	6.73	6.37	2.32	0.27	1.67	0.57
Cluster-29126.8847	6.9	39.36	50.13	16.84	6.78	14.33
Cluster-29126.6026	1.42	3.55	3.41	0.79	1.71	1.49
Cluster-29126.18746	26.96	298.95	205.96	49.3	82.15	24.28
Cluster-29126.18618	51.94	91.48	85.14	24.91	25.56	34.27
Cluster-29126.8292	0.88	71.79	115.17	18.78	14.15	11.08
Cluster-29126.15553	30.28	152.06	114.15	30.97	37.84	34.8
Cluster-29126.2308	3.93	3.13	2.21	0.56	2.37	1.57
