# Supplementary material for: Transcriptome profiling helps to elucidate the mechanisms of ripening and epidermal senescence in passion fruit (Passiflora edulia Sims)
Source: PLoS One. 2020 Sep 25;15(9):e0236535. doi: 10.1371/journal.pone.0236535 (PMC7518611; doi:10.1371/journal.pone.0236535)
Supplement: S1 Table — (XLSX) [file pone.0236535.s003.xlsx]

## Sheet: Primers
List of primers used by RT-PCR
Gene_ID	Primer F5'-3'	Primer R5'-3'	Length(bp)	TM(℃)
Cluster-29126.19339	CCTAATGCATCGCACATCAC	CAACTGTATCCGCAAGAGCA	115	60
Cluster-29126.16831	ACAAGCCATAAGCCATGAGG	CTCACCATCGACCCAGAGAT	96	60
Cluster-29126.17170	GTCCCCGGAATCTTCTTCTC	GACCAGCTGAGCTCCAAATC	138	60
Cluster-29126.6929	GGTGACCGTCAATGAAGTCC	TCTTGTGCTCGCTCTTTGTG	146	60
Cluster-29126.23818	CGGCTAGAGAAGTTGGCATC	ACCTACGTCTGGGATTCGTG	94	59
Cluster-29126.9769	GTGCCGTGGCAAAAACTATT	AGACCAGCAGCTTTCATCGT	104	60
Cluster-29126.22876	AGGGGTCACACACGTATTCC	TAGTGGCCATCACATGGAGA	98	60
Cluster-29126.13688	GCAGCACATGAGGCAAGTAA	GTGCCTGAAAGGAAAAGCTG	164	60
Cluster-29126.5571	ATGCGGAGCAGAGACTGAAT	TCACCTCCCTCTTCATCCAC	148	60
Cluster-29126.6512	ATGGCTCGAGAGGTTCTTCA	GCCATGTCTGCTCTGTCGTA	98	60
Cluster-29126.17622	GGGCGGACATATATGGATTG	TGATGCGGCTTGTAGCATAG	118	60
Cluster-29126.21896	GGTCCAGAATTTTCCGATGA	TTCGGTGAAAAGGAAAATGG	132	59
Cluster-29126.8974	TCGACTGCCCATATTCACAA	CCCCAAAGAAAAGCAAACAG	98	59
Cluster-29126.10589	TGACGCGATCTACAATGAGC	ACAACCAGTCATGGCCTTTC	101	59
Cluster-29126.16363	CCCACACGGAATTGAAGAGT	CAAGCAACCGATCCTCTCTC	108	59
Cluster-29126.23818	CGGCTAGAGAAGTTGGCATC	ACCTACGTCTGGGATTCGTG	94	60
Cluster-29126.22988	GTTCCCAGCATCAAAGCCTA	ATCACTCCCGCAGTGTAACC	148	60
Cluster-29126.10249	GGGAAGCAGCTACTCCCTCT	TCTGATGGGAACATCATCCA	190	59
GAPDH-Plant	AAGGCTGTTGGCAAGGTG	GTGGTCGTTCAGAGCAATCC	192	60

## Sheet: RT-PCR+FPKM
Mean value of RT-PCR and FPKM by RNA_seq data
Gene_ID	Cluster-29126.17622		Cluster-29126.21896		Cluster-29126.8974		Cluster-29126.16363		Cluster-29126.23818		Cluster-29126.22988		Cluster-29126.10249
Sample	RT-PCR	FKFM_FC	RT-PCR	FKFM_FC	RT-PCR	FKFM_FC	RT-PCR	FKFM_FC	RT-PCR	FKFM_FC	RT-PCR	FKFM_FC	RT-PCR	FKFM_FC
A	1	1	1	1	1	1	1	1	1	1	1	1	1	1
B	2.83912	2.47739	0.279587	0.113993	8.63256	5.85269	2.75541	1.64642	7.44022	6.37838	27.265	3774.04	17.2118	61.55
C	1.55363	2.41171	0.602932	0.604778	6.54413	4.21317	1.0016	0.719573	12.4936	138.189	31.2859	4342.65	38.77	79.88
D	1.02724	1.33738	0.199833	0.169966	2.58058	2.51473	0.412085	0.330067	6.6745	96.5447	30.7629	1255.98	13.9815	19.81
E	2.12489	0.608414	2.02057	1.82253	1.04897	1.43501	0.199175	0.216852	3.10726	40.4678	9.39187	329.051	8.23952	8.93
F	1.0016	1.06119	0.177911	0.115358	0.880628	1.10399	1.02716	0.656434	19.2792	145.667	5.28649	304.276	2.9408	2.42
G	1.10429	1.05354	0.46951	0.235495	5.69315	4.32582	0.436921	0.506641	23.8496	150.48	10.1175	834.092	11.1833	25.06
H	1.29815	1.73578	0.617849	0.169966	2.15148	2.00693	2.41495	0.467668	21.7527	144.971	26.3906	1069.08	7.17571	15.8
J	1.1301	1.00632	0.876728	0.634812	2.35486	2.41248	3.00762	0.471152	13.1378	92.1788	3.04265	366.847	3.48778	8.18
Gene_ID	Cluster-29126.19339		Cluster-29126.16831		Cluster-29126.17170		Cluster-29126.6929		Cluster-29126.23818		Cluster-29126.9769		Cluster-29126.22876		Cluster-29126.13688		Cluster-29126.5571		Cluster-29126.6512
Sample	RT-PCR	FKFM_FC	RT-PCR	FKFM_FC	RT-PCR	FKFM_FC	RT-PCR	FKFM_FC	RT-PCR	FKFM_FC	RT-PCR	FKFM_FC	RT-PCR	FKFM_FC	RT-PCR	FKFM_FC	RT-PCR	FKFM_FC	RT-PCR	FKFM_FC
A	1	1	1	1	1	1	1	1	1	1	1	1	1	1	1	1	1	1	1	1
B	2.54192	2.65145	8.63503	9.851	5.43973	5.44317	10.1509	11.0154	6.44146	6.37838	12.7807	178.667	16.1609	132.629	7.86013	10.5824	5.83016	6.06061	18.8799	350.5
C	4.61217	3.60828	10.3531	10.0707	2.66555	3.31107	19.7712	313.888	47.8825	138.189	45.4222	4216.47	9.43995	80.1774	11.3863	11.1505	10.3852	8.69697	36.8973	1102.5
